# Supplementary material
Source: publisher site journal article supplement (https://www.dovepress.com/article/317420)
Supplement: Supplementary file 1 [file get_supplementary_file.php]

## Appendix1-DAY21 IL-21 Two-Sample T-Tests Allowing Unequal Variance

### Numeric Results for Two-Sample T-Test Allowing Unequal Variance

Alternative Hypothesis:  $H1: \delta = \mu_1 - \mu_2 \neq 0$

| Target Power | Actual Power | N1 | N2 | N | $\mu_1$ | $\mu_2$ | $\delta$ | $\sigma_1$ | $\sigma_2$ | Alpha |
|--------------|--------------|----|----|---|---------|---------|----------|------------|------------|-------|
| 0.90         | 0.99986      | 3  | 3  | 6 | 146.4   | 243.9   | -97.6    | 16.3       | 12.9       | 0.050 |

#### References

- Julious, S. A. 2010. Sample Sizes for Clinical Trials. Chapman & Hall/CRC. Boca Raton, FL.
- Chow, S. C., Shao, J., and Wang, H. 2008. Sample Size Calculations in Clinical Research (Second Edition). Chapman & Hall/CRC. Boca Raton, FL.
- Machin, D., Campbell, M., Fayers, P., and Pinol, A. 1997. Sample Size Tables for Clinical Studies, 2nd Edition. Blackwell Science. Malden, MA.
- Zar, Jerrold H. 1984. Biostatistical Analysis (Second Edition). Prentice-Hall. Englewood Cliffs, New Jersey.

#### Report Definitions

Target Power is the desired power value (or values) entered in the procedure. Power is the probability of rejecting a false null hypothesis.

Actual Power is the power obtained in this scenario. Because N1 and N2 are discrete, this value is often (slightly) larger than the target power.

N1 and N2 are the number of items sampled from each population.

N is the total sample size,  $N_1 + N_2$ .

$\mu_1$  and  $\mu_2$  are the assumed population means.

$\delta = \mu_1 - \mu_2$  is the difference between population means at which power and sample size calculations are made.

$\sigma_1$  and  $\sigma_2$  are the assumed population standard deviations for groups 1 and 2, respectively.

Alpha is the probability of rejecting a true null hypothesis.

#### Summary Statements

Group sample sizes of 3 and 3 achieve 99.986% power to reject the null hypothesis of equal means when the population mean difference is  $\mu_1 - \mu_2 = 146.4 - 243.9 = -97.6$  with standard deviations of 16.3 for group 1 and 12.9 for group 2, and with a significance level (alpha) of 0.050 using a two-sided two-sample unequal-variance t-test.

#### Dropout-Inflated Sample Size

| Dropout Rate | Sample Size |    |   | Dropout-Inflated Enrollment Sample Size |     |    | Expected Number of Dropouts |    |   |
|--------------|-------------|----|---|-----------------------------------------|-----|----|-----------------------------|----|---|
|              | N1          | N2 | N | N1'                                     | N2' | N' | D1                          | D2 | D |
| 20%          | 3           | 3  | 6 | 4                                       | 4   | 8  | 1                           | 1  | 2 |

#### Definitions

Dropout Rate (DR) is the percentage of subjects (or items) that are expected to be lost at random during the course of the study and for whom no response data will be collected (i.e. will be treated as "missing").

N1, N2, and N are the evaluable sample sizes at which power is computed. If N1 and N2 subjects are evaluated out of the N1' and N2' subjects that are enrolled in the study, the design will achieve the stated power.

N1', N2', and N' are the number of subjects that should be enrolled in the study in order to end up with N1, N2, and N evaluable subjects, based on the assumed dropout rate. After solving for N1 and N2, N1' and N2' are calculated by inflating N1 and N2 using the formulas  $N1' = N1 / (1 - DR)$  and  $N2' = N2 / (1 - DR)$ , with N1' and N2' always rounded up. (See Julious, S.A. (2010) pages 52-53, or Chow, S.C., Shao, J., and Wang, H. (2008) pages 39-40.)

D1, D2, and D are the expected number of dropouts.  $D1 = N1' - N1$ ,  $D2 = N2' - N2$ , and  $D = D1 + D2$ .

## Two-Sample T-Tests Allowing Unequal Variance

### Procedure Input Settings

#### Autosaved Template File

C:\Users\弦er77\OneDrive\文档\PASS 15\Procedure Templates\Autosave\Two-Sample T-Tests Allowing Unequal Variance - Autosaved 2021\_6\_25-21\_53\_29.t389

#### Design Tab

|                         |                 |
|-------------------------|-----------------|
| Solve For:              | Sample Size     |
| Alternative Hypothesis: | Two-Sided       |
| Power:                  | 0.90            |
| Alpha:                  | 0.05            |
| Group Allocation:       | Equal (N1 = N2) |
| Input Type:             | Means           |
| $\mu_1$ :               | 146.36          |
| $\mu_2$ :               | 243.91          |
| $\sigma_1$ :            | 16.28           |
| $\sigma_2$ :            | 12.86           |

## Appendix2-DAY21 IgG4 Two-Sample T-Tests Allowing Unequal Variance

### Numeric Results for Two-Sample T-Test Allowing Unequal Variance

Alternative Hypothesis:  $H1: \delta = \mu1 - \mu2 \neq 0$

| Target Power | Actual Power | N1 | N2 | N  | $\mu1$ | $\mu2$ | $\delta$ | $\sigma1$ | $\sigma2$ | Alpha |
|--------------|--------------|----|----|----|--------|--------|----------|-----------|-----------|-------|
| 0.90         | 0.92207      | 5  | 5  | 10 | 220.9  | 258.6  | -37.8    | 9.5       | 18.4      | 0.050 |

### References

Julious, S. A. 2010. Sample Sizes for Clinical Trials. Chapman & Hall/CRC. Boca Raton, FL.  
 Chow, S. C., Shao, J., and Wang, H. 2008. Sample Size Calculations in Clinical Research (Second Edition). Chapman & Hall/CRC. Boca Raton, FL.  
 Machin, D., Campbell, M., Fayers, P., and Pinol, A. 1997. Sample Size Tables for Clinical Studies, 2nd Edition. Blackwell Science. Malden, MA.  
 Zar, Jerrold H. 1984. Biostatistical Analysis (Second Edition). Prentice-Hall. Englewood Cliffs, New Jersey.

### Report Definitions

Target Power is the desired power value (or values) entered in the procedure. Power is the probability of rejecting a false null hypothesis.

Actual Power is the power obtained in this scenario. Because N1 and N2 are discrete, this value is often (slightly) larger than the target power.

N1 and N2 are the number of items sampled from each population.

N is the total sample size,  $N1 + N2$ .

$\mu1$  and  $\mu2$  are the assumed population means.

$\delta = \mu1 - \mu2$  is the difference between population means at which power and sample size calculations are made.

$\sigma1$  and  $\sigma2$  are the assumed population standard deviations for groups 1 and 2, respectively.

Alpha is the probability of rejecting a true null hypothesis.

### Summary Statements

Group sample sizes of 5 and 5 achieve 92.207% power to reject the null hypothesis of equal means when the population mean difference is  $\mu1 - \mu2 = 220.9 - 258.6 = -37.8$  with standard deviations of 9.5 for group 1 and 18.4 for group 2, and with a significance level (alpha) of 0.050 using a two-sided two-sample unequal-variance t-test.

### Dropout-Inflated Sample Size

| Dropout Rate | Sample Size |    |    | Dropout-Inflated Enrollment Sample Size |     |    | Expected Number of Dropouts |    |   |
|--------------|-------------|----|----|-----------------------------------------|-----|----|-----------------------------|----|---|
|              | N1          | N2 | N  | N1'                                     | N2' | N' | D1                          | D2 | D |
| 20%          | 5           | 5  | 10 | 7                                       | 7   | 14 | 2                           | 2  | 4 |

### Definitions

Dropout Rate (DR) is the percentage of subjects (or items) that are expected to be lost at random during the course of the study and for whom no response data will be collected (i.e. will be treated as "missing").

N1, N2, and N are the evaluable sample sizes at which power is computed. If N1 and N2 subjects are evaluated out of the N1' and N2' subjects that are enrolled in the study, the design will achieve the stated power.

N1', N2', and N' are the number of subjects that should be enrolled in the study in order to end up with N1, N2, and N evaluable subjects, based on the assumed dropout rate. After solving for N1 and N2, N1' and N2' are calculated by inflating N1 and N2 using the formulas  $N1' = N1 / (1 - DR)$  and  $N2' = N2 / (1 - DR)$ , with N1' and N2' always rounded up. (See Julious, S.A. (2010) pages 52-53, or Chow, S.C., Shao, J., and Wang, H. (2008) pages 39-40.)

D1, D2, and D are the expected number of dropouts.  $D1 = N1' - N1$ ,  $D2 = N2' - N2$ , and  $D = D1 + D2$ .

## Two-Sample T-Tests Allowing Unequal Variance

### Procedure Input Settings

#### Autosaved Template File

C:\Users\弦er77\OneDrive\文档\PASS 15\Procedure Templates\Autosave\Two-Sample T-Tests Allowing Unequal Variance - Autosaved 2021\_6\_25-22\_7\_28.t389

#### Design Tab

|                         |                 |
|-------------------------|-----------------|
| Solve For:              | Sample Size     |
| Alternative Hypothesis: | Two-Sided       |
| Power:                  | 0.90            |
| Alpha:                  | 0.05            |
| Group Allocation:       | Equal (N1 = N2) |
| Input Type:             | Means           |
| $\mu_1$ :               | 220.87          |
| $\mu_2$ :               | 258.62          |
| $\sigma_1$ :            | 9.47            |
| $\sigma_2$ :            | 18.36           |

### Appendix3-DAY35 IL-21

#### Two-Sample T-Tests Allowing Unequal Variance

##### Numeric Results for Two-Sample T-Test Allowing Unequal Variance

Alternative Hypothesis:  $H1: \delta = \mu1 - \mu2 \neq 0$

| Target Power | Actual Power | N1 | N2 | N  | $\mu1$ | $\mu2$ | $\delta$ | $\sigma1$ | $\sigma2$ | Alpha |
|--------------|--------------|----|----|----|--------|--------|----------|-----------|-----------|-------|
| 0.90         | 0.95219      | 5  | 5  | 10 | 217.7  | 156.1  | 61.6     | 21.2      | 25.2      | 0.050 |

##### References

Julious, S. A. 2010. Sample Sizes for Clinical Trials. Chapman & Hall/CRC. Boca Raton, FL.  
 Chow, S. C., Shao, J., and Wang, H. 2008. Sample Size Calculations in Clinical Research (Second Edition). Chapman & Hall/CRC. Boca Raton, FL.  
 Machin, D., Campbell, M., Fayers, P., and Pinol, A. 1997. Sample Size Tables for Clinical Studies, 2nd Edition. Blackwell Science. Malden, MA.  
 Zar, Jerrold H. 1984. Biostatistical Analysis (Second Edition). Prentice-Hall. Englewood Cliffs, New Jersey.

##### Report Definitions

Target Power is the desired power value (or values) entered in the procedure. Power is the probability of rejecting a false null hypothesis.

Actual Power is the power obtained in this scenario. Because N1 and N2 are discrete, this value is often (slightly) larger than the target power.

N1 and N2 are the number of items sampled from each population.

N is the total sample size,  $N1 + N2$ .

$\mu1$  and  $\mu2$  are the assumed population means.

$\delta = \mu1 - \mu2$  is the difference between population means at which power and sample size calculations are made.

$\sigma1$  and  $\sigma2$  are the assumed population standard deviations for groups 1 and 2, respectively.

Alpha is the probability of rejecting a true null hypothesis.

##### Summary Statements

Group sample sizes of 5 and 5 achieve 95.219% power to reject the null hypothesis of equal means when the population mean difference is  $\mu1 - \mu2 = 217.7 - 156.1 = 61.6$  with standard deviations of 21.2 for group 1 and 25.2 for group 2, and with a significance level (alpha) of 0.050 using a two-sided two-sample unequal-variance t-test.

##### Dropout-Inflated Sample Size

| Dropout Rate | Sample Size |    |    | Dropout-Inflated Enrollment Sample Size |     |    | Expected Number of Dropouts |    |   |
|--------------|-------------|----|----|-----------------------------------------|-----|----|-----------------------------|----|---|
|              | N1          | N2 | N  | N1'                                     | N2' | N' | D1                          | D2 | D |
| 20%          | 5           | 5  | 10 | 7                                       | 7   | 14 | 2                           | 2  | 4 |

##### Definitions

Dropout Rate (DR) is the percentage of subjects (or items) that are expected to be lost at random during the course of the study and for whom no response data will be collected (i.e. will be treated as "missing").

N1, N2, and N are the evaluable sample sizes at which power is computed. If N1 and N2 subjects are evaluated out of the N1' and N2' subjects that are enrolled in the study, the design will achieve the stated power.

N1', N2', and N' are the number of subjects that should be enrolled in the study in order to end up with N1, N2, and N evaluable subjects, based on the assumed dropout rate. After solving for N1 and N2, N1' and N2' are calculated by inflating N1 and N2 using the formulas  $N1' = N1 / (1 - DR)$  and  $N2' = N2 / (1 - DR)$ , with N1' and N2' always rounded up. (See Julious, S.A. (2010) pages 52-53, or Chow, S.C., Shao, J., and Wang, H. (2008) pages 39-40.)

D1, D2, and D are the expected number of dropouts.  $D1 = N1' - N1$ ,  $D2 = N2' - N2$ , and  $D = D1 + D2$ .

**Two-Sample T-Tests Allowing Unequal Variance****Procedure Input Settings****Autosaved Template File**

C:\Users\弦er77\OneDrive\文档\PASS 15\Procedure Templates\Autosave\Two-Sample T-Tests Allowing Unequal Variance - Autosaved 2021\_6\_25-22\_3\_47.t389

**Design Tab**

|                         |                 |
|-------------------------|-----------------|
| Solve For:              | Sample Size     |
| Alternative Hypothesis: | Two-Sided       |
| Power:                  | 0.90            |
| Alpha:                  | 0.05            |
| Group Allocation:       | Equal (N1 = N2) |
| Input Type:             | Means           |
| $\mu_1$ :               | 217.72          |
| $\mu_2$ :               | 156.14          |
| $\sigma_1$ :            | 21.16           |
| $\sigma_2$ :            | 25.23           |

## Appendix4-DAY35 IgG4 Two-Sample T-Tests Allowing Unequal Variance

### Numeric Results for Two-Sample T-Test Allowing Unequal Variance

Alternative Hypothesis:  $H1: \delta = \mu1 - \mu2 \neq 0$

| Target Power | Actual Power | N1 | N2 | N | $\mu1$ | $\mu2$ | $\delta$ | $\sigma1$ | $\sigma2$ | Alpha |
|--------------|--------------|----|----|---|--------|--------|----------|-----------|-----------|-------|
| 0.90         | 0.96326      | 4  | 4  | 8 | 271.0  | 170.5  | 100.5    | 34.7      | 26.1      | 0.050 |

### References

- Julious, S. A. 2010. Sample Sizes for Clinical Trials. Chapman & Hall/CRC. Boca Raton, FL.
- Chow, S. C., Shao, J., and Wang, H. 2008. Sample Size Calculations in Clinical Research (Second Edition). Chapman & Hall/CRC. Boca Raton, FL.
- Machin, D., Campbell, M., Fayers, P., and Pinol, A. 1997. Sample Size Tables for Clinical Studies, 2nd Edition. Blackwell Science. Malden, MA.
- Zar, Jerrold H. 1984. Biostatistical Analysis (Second Edition). Prentice-Hall. Englewood Cliffs, New Jersey.

### Report Definitions

Target Power is the desired power value (or values) entered in the procedure. Power is the probability of rejecting a false null hypothesis.

Actual Power is the power obtained in this scenario. Because N1 and N2 are discrete, this value is often (slightly) larger than the target power.

N1 and N2 are the number of items sampled from each population.

N is the total sample size,  $N1 + N2$ .

$\mu1$  and  $\mu2$  are the assumed population means.

$\delta = \mu1 - \mu2$  is the difference between population means at which power and sample size calculations are made.

$\sigma1$  and  $\sigma2$  are the assumed population standard deviations for groups 1 and 2, respectively.

Alpha is the probability of rejecting a true null hypothesis.

### Summary Statements

Group sample sizes of 4 and 4 achieve 96.326% power to reject the null hypothesis of equal means when the population mean difference is  $\mu1 - \mu2 = 271.0 - 170.5 = 100.5$  with standard deviations of 34.7 for group 1 and 26.1 for group 2, and with a significance level (alpha) of 0.050 using a two-sided two-sample unequal-variance t-test.

### Dropout-Inflated Sample Size

| Dropout Rate | Sample Size |    |   | Dropout-Inflated Enrollment Sample Size |     |    | Expected Number of Dropouts |    |   |
|--------------|-------------|----|---|-----------------------------------------|-----|----|-----------------------------|----|---|
|              | N1          | N2 | N | N1'                                     | N2' | N' | D1                          | D2 | D |
| 20%          | 4           | 4  | 8 | 5                                       | 5   | 10 | 1                           | 1  | 2 |

### Definitions

Dropout Rate (DR) is the percentage of subjects (or items) that are expected to be lost at random during the course of the study and for whom no response data will be collected (i.e. will be treated as "missing").

N1, N2, and N are the evaluable sample sizes at which power is computed. If N1 and N2 subjects are evaluated out of the N1' and N2' subjects that are enrolled in the study, the design will achieve the stated power.

N1', N2', and N' are the number of subjects that should be enrolled in the study in order to end up with N1, N2, and N evaluable subjects, based on the assumed dropout rate. After solving for N1 and N2, N1' and N2' are calculated by inflating N1 and N2 using the formulas  $N1' = N1 / (1 - DR)$  and  $N2' = N2 / (1 - DR)$ , with N1' and N2' always rounded up. (See Julious, S.A. (2010) pages 52-53, or Chow, S.C., Shao, J., and Wang, H. (2008) pages 39-40.)

D1, D2, and D are the expected number of dropouts.  $D1 = N1' - N1$ ,  $D2 = N2' - N2$ , and  $D = D1 + D2$ .

## Two-Sample T-Tests Allowing Unequal Variance

### Procedure Input Settings

#### Autosaved Template File

C:\Users\弦er77\OneDrive\文档\PASS 15\Procedure Templates\Autosave\Two-Sample T-Tests Allowing Unequal Variance - Autosaved 2021\_6\_25-22\_10\_32.t389

#### Design Tab

|                         |                 |
|-------------------------|-----------------|
| Solve For:              | Sample Size     |
| Alternative Hypothesis: | Two-Sided       |
| Power:                  | 0.90            |
| Alpha:                  | 0.05            |
| Group Allocation:       | Equal (N1 = N2) |
| Input Type:             | Means           |
| $\mu_1$ :               | 270.97          |
| $\mu_2$ :               | 170.47          |
| $\sigma_1$ :            | 34.71           |
| $\sigma_2$ :            | 26.06           |
